# Supplementary material for: Differences in Performance of ASD and ADHD Subjects Facing Cognitive Loads in an Innovative Reasoning Experiment
Source: MDPI journal article supplement (doi:10.3390/brainsci11111531), 2021-11-18
Supplement: s1 [file s1]

## SUPPLEMENTARY MATERIAL

**Table S1.** Demographics of group of participants, used in the mixed ANOVA and X<sup>2</sup> analysis

| group            |                  |           |         |               |                    |
|------------------|------------------|-----------|---------|---------------|--------------------|
|                  |                  | Frequency | Percent | Valid Percent | Cumulative Percent |
| Valid            | ASD              | 30        | 37.0    | 37.0          | 37.0               |
|                  | ADHD             | 30        | 37.0    | 37.0          | 74.1               |
|                  | normal           | 21        | 25.9    | 25.9          | 100.0              |
|                  | Total            | 81        | 100.0   | 100.0         |                    |
| gender           |                  |           |         |               |                    |
|                  |                  | Frequency | Percent | Valid Percent | Cumulative Percent |
| Valid            | male             | 57        | 70.4    | 71.3          | 71.3               |
|                  | female           | 23        | 28.4    | 28.7          | 100.0              |
|                  | Total            | 80        | 98.8    | 100.0         |                    |
| Missing          | System           | 1         | 1.2     |               |                    |
| Total            |                  | 81        | 100.0   |               |                    |
| education        |                  |           |         |               |                    |
|                  |                  | Frequency | Percent | Valid Percent | Cumulative Percent |
| Valid            | likio            | 21        | 25.9    | 26.9          | 26.9               |
|                  | aei_tei          | 46        | 56.8    | 59.0          | 85.9               |
|                  | master           | 10        | 12.3    | 12.8          | 98.7               |
|                  | phd              | 1         | 1.2     | 1.3           | 100.0              |
|                  | Total            | 78        | 96.3    | 100.0         |                    |
| Missing          | System           | 3         | 3.7     |               |                    |
| Total            |                  | 81        | 100.0   |               |                    |
| occupation       |                  |           |         |               |                    |
|                  |                  | Frequency | Percent | Valid Percent | Cumulative Percent |
| Valid            | not_working      | 7         | 8.6     | 9.3           | 9.3                |
|                  | freelancer       | 16        | 19.8    | 21.3          | 30.7               |
|                  | student          | 35        | 43.2    | 46.7          | 77.3               |
|                  | public_servant   | 4         | 4.9     | 5.3           | 82.7               |
|                  | private_employee | 13        | 16.0    | 17.3          | 100.0              |
|                  | Total            | 75        | 92.6    | 100.0         |                    |
| Missing          | System           | 6         | 7.4     |               |                    |
| Total            |                  | 81        | 100.0   |               |                    |
| smoking          |                  |           |         |               |                    |
|                  |                  | Frequency | Percent | Valid Percent | Cumulative Percent |
| Valid            | yes              | 23        | 28.4    | 28.4          | 28.4               |
|                  | no               | 58        | 71.6    | 71.6          | 100.0              |
|                  | Total            | 81        | 100.0   | 100.0         |                    |
| hand_L_R         |                  |           |         |               |                    |
|                  |                  | Frequency | Percent | Valid Percent | Cumulative Percent |
| Valid            | left_handed      | 5         | 6.2     | 6.2           | 6.2                |
|                  | right_handed     | 73        | 90.1    | 90.1          | 96.3               |
|                  | both             | 3         | 3.7     | 3.7           | 100.0              |
|                  | Total            | 81        | 100.0   | 100.0         |                    |
| health_issues    |                  |           |         |               |                    |
|                  |                  | Frequency | Percent | Valid Percent | Cumulative Percent |
| Valid            | yes              | 24        | 29.6    | 30.8          | 30.8               |
|                  | no               | 54        | 66.7    | 69.2          | 100.0              |
|                  | Total            | 78        | 96.3    | 100.0         |                    |
| Missing          | System           | 3         | 3.7     |               |                    |
| Total            |                  | 81        | 100.0   |               |                    |
| health_treatment |                  |           |         |               |                    |
|                  |                  | Frequency | Percent | Valid Percent | Cumulative Percent |
| Valid            | yes              | 28        | 34.6    | 35.4          | 35.4               |
|                  | no               | 51        | 63.0    | 64.6          | 100.0              |
|                  | Total            | 79        | 97.5    | 100.0         |                    |
| Missing          | System           | 2         | 2.5     |               |                    |
| Total            |                  | 81        | 100.0   |               |                    |

**Table S2.** Descriptive statistics of all variables involved in the mixed ANOVA and X<sup>2</sup> analysis

| Descriptive Statistics |        |            |                |    |
|------------------------|--------|------------|----------------|----|
|                        | group  | Mean       | Std. Deviation | N  |
| AF3_VALID              | ASD    | .719485498 | .1488445645    | 21 |
|                        | ADHD   | .779432267 | .0911077627    | 21 |
|                        | normal | .738849453 | .1051185133    | 21 |
|                        | Total  | .745922406 | .1184178913    | 63 |
| AF3_MSE_INVALID        | ASD    | .76173370  | .086142267     | 21 |
|                        | ADHD   | .78106342  | .071223308     | 21 |
|                        | normal | .74472072  | .118535001     | 21 |
|                        | Total  | .76250595  | .093736334     | 63 |
| F7_VALID               | ASD    | .66101720  | .176104891     | 21 |
|                        | ADHD   | .75158884  | .080655825     | 21 |
|                        | normal | .73004188  | .071889186     | 21 |
|                        | Total  | .71421598  | .123637758     | 63 |
| F7_MSE_INVALID         | ASD    | .71164674  | .098174472     | 21 |
|                        | ADHD   | .76744325  | .062989499     | 21 |
|                        | normal | .73707679  | .082469139     | 21 |
|                        | Total  | .73872224  | .084322733     | 63 |
| F3_VALID               | ASD    | .74330678  | .168153710     | 21 |
|                        | ADHD   | .80175403  | .071396813     | 21 |
|                        | normal | .77049502  | .124222285     | 21 |
|                        | Total  | .77185194  | .127760732     | 63 |
| F3_MSE_INVALID         | ASD    | .76518508  | .097014729     | 21 |
|                        | ADHD   | .81229310  | .061701308     | 21 |
|                        | normal | .78038291  | .129588648     | 21 |
|                        | Total  | .78595370  | .100363961     | 63 |
| FC5_VALID              | ASD    | .66574390  | .178263660     | 21 |
|                        | ADHD   | .73872253  | .086234516     | 21 |
|                        | normal | .71631991  | .116994168     | 21 |
|                        | Total  | .70692878  | .134208494     | 63 |
| FC5_MSE_INVALID        | ASD    | .67900118  | .163453413     | 21 |
|                        | ADHD   | .74470196  | .084148007     | 21 |
|                        | normal | .70899978  | .119055873     | 21 |
|                        | Total  | .71090097  | .127309770     | 63 |
| T7_VALID               | ASD    | .688174970 | .1725729717    | 21 |
|                        | ADHD   | .763300846 | .0778176488    | 21 |
|                        | normal | .701809607 | .0927572479    | 21 |
|                        | Total  | .717761808 | .1241808834    | 63 |
| T7_MSE_INVALID         | ASD    | .70948109  | .128770882     | 21 |
|                        | ADHD   | .76744016  | .061931910     | 21 |
|                        | normal | .70080863  | .086818324     | 21 |
|                        | Total  | .72590896  | .099532620     | 63 |
| P7_VALID               | ASD    | .656845681 | .1688264685    | 21 |
|                        | ADHD   | .753774513 | .0763321512    | 21 |
|                        | normal | .698456634 | .1190464078    | 21 |
|                        | Total  | .703025609 | .1313286681    | 63 |
| P7_MSE_INVALID         | ASD    | .66909361  | .134075686     | 21 |
|                        | ADHD   | .77088122  | .052364797     | 21 |
|                        | normal | .71757367  | .104729601     | 21 |
|                        | Total  | .71918284  | .109440013     | 63 |
| O1_VALID               | ASD    | .67746842  | .153546275     | 21 |
|                        | ADHD   | .79761240  | .057831743     | 21 |
|                        | normal | .75176442  | .093454845     | 21 |
|                        | Total  | .74228175  | .118286905     | 63 |
| O1_MSE_INVALID         | ASD    | .73453145  | .085138458     | 21 |
|                        | ADHD   | .78233100  | .100735026     | 21 |
|                        | normal | .75390571  | .104271266     | 21 |
|                        | Total  | .75692272  | .097621633     | 63 |
| O2_VALID               | ASD    | .555951748 | .1723093273    | 21 |
|                        | ADHD   | .783208804 | .0804716324    | 21 |
|                        | normal | .653472469 | .1668562183    | 21 |
|                        | Total  | .664211007 | .1716173890    | 63 |
| O2_MSE_INVALID         | ASD    | .60358045  | .133158269     | 21 |
|                        | ADHD   | .77363357  | .094662376     | 21 |
|                        | normal | .63083348  | .202464026     | 21 |
|                        | Total  | .66931585  | .165763440     | 63 |
| P8_VALID               | ASD    | .67986660  | .175053988     | 21 |
|                        | ADHD   | .77855821  | .065189169     | 21 |
|                        | normal | .71597941  | .135466922     | 21 |
|                        | Total  | .72480054  | .137348880     | 63 |
| P8_MSE_INVALID         | ASD    | .70916269  | .092391200     | 21 |
|                        | ADHD   | .76814757  | .063953884     | 21 |
|                        | normal | .72089591  | .179139483     | 21 |
|                        | Total  | .73272642  | .122823264     | 63 |
| T8_VALID               | ASD    | .65426342  | .178755200     | 21 |
|                        | ADHD   | .72761438  | .081061145     | 21 |
|                        | normal | .70206929  | .119838020     | 21 |
|                        | Total  | .69464903  | .134160343     | 63 |
| T8_MSE_INVALID         | ASD    | .68237969  | .109755588     | 21 |
|                        | ADHD   | .72141155  | .091342007     | 21 |
|                        | normal | .71830863  | .135250585     | 21 |
|                        | Total  | .70736662  | .113123930     | 63 |
| FC6_VALID              | ASD    | .70104052  | .155847055     | 21 |
|                        | ADHD   | .76681494  | .061444105     | 21 |
|                        | normal | .72011523  | .099499995     | 21 |
|                        | Total  | .72932356  | .114114791     | 63 |
| FC6_MSE_INVALID        | ASD    | .74800507  | .088346476     | 21 |
|                        | ADHD   | .77489909  | .049889883     | 21 |
|                        | normal | .72441690  | .108088642     | 21 |
|                        | Total  | .74910702  | .086737961     | 63 |
| F4_VALID               | ASD    | .687780494 | .1880064839    | 21 |
|                        | ADHD   | .792041598 | .0837398851    | 21 |
|                        | normal | .721355829 | .1651357416    | 21 |
|                        | Total  | .733728974 | .1561394901    | 63 |
| F4_MSE_INVALID         | ASD    | .72608702  | .134834316     | 21 |
|                        | ADHD   | .79591200  | .072872456     | 21 |
|                        | normal | .73610346  | .156215707     | 21 |
|                        | Total  | .75270083  | .128122366     | 63 |
| F8_VALID               | ASD    | .69137379  | .198570362     | 21 |
|                        | ADHD   | .75089760  | .095455238     | 21 |
|                        | normal | .71105558  | .102801581     | 21 |
|                        | Total  | .71777566  | .140323706     | 63 |
| F8_MSE_INVALID         | ASD    | .72323876  | .106599986     | 21 |
|                        | ADHD   | .77578866  | .045898090     | 21 |
|                        | normal | .73726609  | .106389946     | 21 |
|                        | Total  | .74576784  | .093046053     | 63 |
| AF4_VALID              | ASD    | .71219789  | .183219027     | 21 |
|                        | ADHD   | .77302463  | .073202788     | 21 |
|                        | normal | .73648516  | .119543232     | 21 |
|                        | Total  | .74058923  | .133425294     | 63 |
| AF4_MSE_INVALID        | ASD    | .74020188  | .113225948     | 21 |
|                        | ADHD   | .77802337  | .061885919     | 21 |
|                        | normal | .73848394  | .117685453     | 21 |
|                        | Total  | .75223640  | .100881153     | 63 |

**Table S3.** MANOVA analysis, Results of multivariate tests of the channel\*group and channels\*syllogism interactions. Manova tests (e.g Wilk's lamda) > 0.14 show large effects.

| Multivariate Tests <sup>a</sup> |                    |       |                     |               |          |      |                     |
|---------------------------------|--------------------|-------|---------------------|---------------|----------|------|---------------------|
| Effect                          |                    | Value | F                   | Hypothesis df | Error df | Sig. | Partial Eta Squared |
| Channels                        | Pillai's Trace     | .834  | 18.599 <sup>b</sup> | 13.000        | 48.000   | .000 | .834                |
|                                 | Wilks' Lambda      | .166  | 18.599 <sup>b</sup> | 13.000        | 48.000   | .000 | .834                |
|                                 | Hotelling's Trace  | 5.037 | 18.599 <sup>b</sup> | 13.000        | 48.000   | .000 | .834                |
|                                 | Roy's Largest Root | 5.037 | 18.599 <sup>b</sup> | 13.000        | 48.000   | .000 | .834                |
| Channels * group                | Pillai's Trace     | .725  | 2.145               | 26.000        | 98.000   | .004 | .363                |
|                                 | Wilks' Lambda      | .383  | 2.276 <sup>b</sup>  | 26.000        | 96.000   | .002 | .381                |
|                                 | Hotelling's Trace  | 1.331 | 2.405               | 26.000        | 94.000   | .001 | .400                |
|                                 | Roy's Largest Root | 1.066 | 4.017 <sup>c</sup>  | 13.000        | 49.000   | .000 | .516                |
| Syllogism                       | Pillai's Trace     | .036  | 2.263 <sup>b</sup>  | 1.000         | 60.000   | .138 | .036                |
|                                 | Wilks' Lambda      | .964  | 2.263 <sup>b</sup>  | 1.000         | 60.000   | .138 | .036                |
|                                 | Hotelling's Trace  | .038  | 2.263 <sup>b</sup>  | 1.000         | 60.000   | .138 | .036                |
|                                 | Roy's Largest Root | .038  | 2.263 <sup>b</sup>  | 1.000         | 60.000   | .138 | .036                |
| Syllogism * group               | Pillai's Trace     | .032  | .985 <sup>b</sup>   | 2.000         | 60.000   | .379 | .032                |
|                                 | Wilks' Lambda      | .968  | .985 <sup>b</sup>   | 2.000         | 60.000   | .379 | .032                |
|                                 | Hotelling's Trace  | .033  | .985 <sup>b</sup>   | 2.000         | 60.000   | .379 | .032                |
|                                 | Roy's Largest Root | .033  | .985 <sup>b</sup>   | 2.000         | 60.000   | .379 | .032                |
| Channels * Syllogism            | Pillai's Trace     | .165  | .730 <sup>b</sup>   | 13.000        | 48.000   | .725 | .165                |
|                                 | Wilks' Lambda      | .835  | .730 <sup>b</sup>   | 13.000        | 48.000   | .725 | .165                |
|                                 | Hotelling's Trace  | .198  | .730 <sup>b</sup>   | 13.000        | 48.000   | .725 | .165                |
|                                 | Roy's Largest Root | .198  | .730 <sup>b</sup>   | 13.000        | 48.000   | .725 | .165                |
| Channels * Syllogism * group    | Pillai's Trace     | .452  | 1.102               | 26.000        | 98.000   | .354 | .226                |
|                                 | Wilks' Lambda      | .592  | 1.106 <sup>b</sup>  | 26.000        | 96.000   | .351 | .230                |
|                                 | Hotelling's Trace  | .613  | 1.109               | 26.000        | 94.000   | .348 | .235                |
|                                 | Roy's Largest Root | .443  | 1.672 <sup>c</sup>  | 13.000        | 49.000   | .098 | .307                |

a. Design: Intercept + group  
Within Subjects Design: Channels + Syllogism + Channels \* Syllogism

b. Exact statistic

c. The statistic is an upper bound on F that yields a lower bound on the significance level.

**Table S4.** Results of the test of sphericity in the mixed ANOVA analysis. Since W=0.022 is significant, the reported F value is epsilon corrected.

| Mauchly's Test of Sphericity <sup>a</sup> |             |                    |    |      |                    |                                     |             |
|-------------------------------------------|-------------|--------------------|----|------|--------------------|-------------------------------------|-------------|
| Measure: MEASURE_1                        |             |                    |    |      |                    |                                     |             |
| Within Subjects Effect                    | Mauchly's W | Approx. Chi-Square | df | Sig. | Greenhouse-Geisser | Epsilon <sup>b</sup><br>Huynh-Feldt | Lower-bound |
| Channels                                  | .022        | 210.972            | 90 | .000 | .601               | .723                                | .077        |
| Syllogism                                 | 1.000       | .000               | 0  | .    | 1.000              | 1.000                               | 1.000       |
| Channels * Syllogism                      | .030        | 194.669            | 90 | .000 | .644               | .783                                | .077        |

Tests the null hypothesis that the error covariance matrix of the orthonormalized transformed dependent variables is proportional to an identity matrix.

a. Design: Intercept + group  
Within Subjects Design: Channels + Syllogism + Channels \* Syllogism

b. May be used to adjust the degrees of freedom for the averaged tests of significance. Corrected tests are displayed in the Tests of Within-Subjects Effects table.

**Table S5.** Results of mixed ANOVA to test within-subjects effects, for MSE values

| Tests of Within-Subjects Effects |                    |                         |         |             |        |      |                     |
|----------------------------------|--------------------|-------------------------|---------|-------------|--------|------|---------------------|
| Measure: MEASURE_1               |                    |                         |         |             |        |      |                     |
| Source                           |                    | Type III Sum of Squares | df      | Mean Square | F      | Sig. | Partial Eta Squared |
| Channels                         | Sphericity Assumed | 1.210                   | 13      | .093        | 12.677 | .000 | .174                |
|                                  | Greenhouse-Geisser | 1.210                   | 7.816   | .155        | 12.677 | .000 | .174                |
|                                  | Huynh-Feldt        | 1.210                   | 9.397   | .129        | 12.677 | .000 | .174                |
|                                  | Lower-bound        | 1.210                   | 1.000   | 1.210       | 12.677 | .001 | .174                |
| Channels * group                 | Sphericity Assumed | .511                    | 26      | .020        | 2.677  | .000 | .082                |
|                                  | Greenhouse-Geisser | .511                    | 15.631  | .033        | 2.677  | .001 | .082                |
|                                  | Huynh-Feldt        | .511                    | 18.794  | .027        | 2.677  | .000 | .082                |
|                                  | Lower-bound        | .511                    | 2.000   | .256        | 2.677  | .077 | .082                |
| Error(Channels)                  | Sphericity Assumed | 5.728                   | 780     | .007        |        |      |                     |
|                                  | Greenhouse-Geisser | 5.728                   | 468.940 | .012        |        |      |                     |
|                                  | Huynh-Feldt        | 5.728                   | 563.832 | .010        |        |      |                     |
|                                  | Lower-bound        | 5.728                   | 60.000  | .095        |        |      |                     |
| Syllogism                        | Sphericity Assumed | .092                    | 1       | .092        | 2.263  | .138 | .036                |
|                                  | Greenhouse-Geisser | .092                    | 1.000   | .092        | 2.263  | .138 | .036                |
|                                  | Huynh-Feldt        | .092                    | 1.000   | .092        | 2.263  | .138 | .036                |
|                                  | Lower-bound        | .092                    | 1.000   | .092        | 2.263  | .138 | .036                |
| Syllogism * group                | Sphericity Assumed | .080                    | 2       | .040        | .985   | .379 | .032                |
|                                  | Greenhouse-Geisser | .080                    | 2.000   | .040        | .985   | .379 | .032                |
|                                  | Huynh-Feldt        | .080                    | 2.000   | .040        | .985   | .379 | .032                |
|                                  | Lower-bound        | .080                    | 2.000   | .040        | .985   | .379 | .032                |
| Error(Syllogism)                 | Sphericity Assumed | 2.441                   | 60      | .041        |        |      |                     |
|                                  | Greenhouse-Geisser | 2.441                   | 60.000  | .041        |        |      |                     |
|                                  | Huynh-Feldt        | 2.441                   | 60.000  | .041        |        |      |                     |
|                                  | Lower-bound        | 2.441                   | 60.000  | .041        |        |      |                     |
| Channels * Syllogism             | Sphericity Assumed | .020                    | 13      | .002        | .983   | .466 | .016                |
|                                  | Greenhouse-Geisser | .020                    | 8.369   | .002        | .983   | .450 | .016                |
|                                  | Huynh-Feldt        | .020                    | 10.173  | .002        | .983   | .458 | .016                |
|                                  | Lower-bound        | .020                    | 1.000   | .020        | .983   | .325 | .016                |
| Channels * Syllogism * group     | Sphericity Assumed | .045                    | 26      | .002        | 1.103  | .329 | .035                |
|                                  | Greenhouse-Geisser | .045                    | 16.737  | .003        | 1.103  | .347 | .035                |
|                                  | Huynh-Feldt        | .045                    | 20.345  | .002        | 1.103  | .340 | .035                |
|                                  | Lower-bound        | .045                    | 2.000   | .022        | 1.103  | .338 | .035                |
| Error (Channels*Syllogism)       | Sphericity Assumed | 1.214                   | 780     | .002        |        |      |                     |
|                                  | Greenhouse-Geisser | 1.214                   | 502.122 | .002        |        |      |                     |
|                                  | Huynh-Feldt        | 1.214                   | 610.361 | .002        |        |      |                     |
|                                  | Lower-bound        | 1.214                   | 60.000  | .020        |        |      |                     |

**Table S6.** Independent ANOVA ANALYSIS, as support to the mixed ANOVA.

| Tests of Between-Subjects Effects |                         |    |             |          |      |                     |
|-----------------------------------|-------------------------|----|-------------|----------|------|---------------------|
| Measure: MEASURE_1                |                         |    |             |          |      |                     |
| Transformed Variable: Average     |                         |    |             |          |      |                     |
| Source                            | Type III Sum of Squares | df | Mean Square | F        | Sig. | Partial Eta Squared |
| Intercept                         | 937.863                 | 1  | 937.863     | 3881.298 | .000 | .985                |
| group                             | 1.722                   | 2  | .861        | 3.564    | .034 | .106                |
| Error                             | 14.498                  | 60 | .242        |          |      |                     |

**Table S7.** Estimated marginal means for group factor.

| 1. group           |      |            |                         |             |
|--------------------|------|------------|-------------------------|-------------|
| Measure: MEASURE_1 |      |            |                         |             |
| group              | Mean | Std. Error | 95% Confidence Interval |             |
|                    |      |            | Lower Bound             | Upper Bound |
| ASD                | .695 | .020       | .654                    | .735        |
| ADHD               | .770 | .020       | .730                    | .811        |
| normal             | .722 | .020       | .682                    | .763        |

**Table S8.** Estimated marginal means for Channels factor.

| 2. Channels        |      |            |                         |             |
|--------------------|------|------------|-------------------------|-------------|
| Measure: MEASURE_1 |      |            |                         |             |
| Channels           | Mean | Std. Error | 95% Confidence Interval |             |
|                    |      |            | Lower Bound             | Upper Bound |
| 1                  | .754 | .012       | .730                    | .778        |
| 2                  | .726 | .012       | .703                    | .750        |
| 3                  | .779 | .013       | .753                    | .805        |
| 4                  | .709 | .016       | .678                    | .740        |
| 5                  | .722 | .012       | .697                    | .747        |
| 6                  | .711 | .013       | .684                    | .738        |
| 7                  | .750 | .011       | .727                    | .772        |
| 8                  | .667 | .017       | .632                    | .702        |
| 9                  | .729 | .015       | .699                    | .759        |
| 10                 | .701 | .014       | .673                    | .729        |
| 11                 | .739 | .011       | .717                    | .762        |
| 12                 | .743 | .017       | .709                    | .777        |
| 13                 | .732 | .014       | .704                    | .759        |
| 14                 | .746 | .014       | .719                    | .774        |

**Table S9.** Estimated marginal means for Syllogism factor.

### 3. Syllogism

Measure: MEASURE\_1

| Syllogism | Mean | Std. Error | 95% Confidence Interval |             |
|-----------|------|------------|-------------------------|-------------|
|           |      |            | Lower Bound             | Upper Bound |
| 1         | .722 | .014       | .693                    | .751        |
| 2         | .736 | .011       | .715                    | .758        |

**Table S10.** Mixed ANOVA interactions effects groups\*channels.

### 4. group \* Channels

Measure: MEASURE\_1

| group  | Channels | Mean | Std. Error | 95% Confidence Interval |             |
|--------|----------|------|------------|-------------------------|-------------|
|        |          |      |            | Lower Bound             | Upper Bound |
| ASD    | 1        | .741 | .021       | .699                    | .783        |
|        | 2        | .686 | .021       | .645                    | .728        |
|        | 3        | .754 | .023       | .709                    | .799        |
|        | 4        | .672 | .027       | .618                    | .726        |
|        | 5        | .699 | .022       | .656                    | .742        |
|        | 6        | .663 | .023       | .617                    | .709        |
|        | 7        | .706 | .019       | .667                    | .745        |
|        | 8        | .580 | .030       | .519                    | .640        |
|        | 9        | .695 | .026       | .643                    | .746        |
|        | 10       | .668 | .024       | .619                    | .717        |
|        | 11       | .725 | .019       | .686                    | .763        |
|        | 12       | .707 | .029       | .648                    | .765        |
|        | 13       | .707 | .024       | .660                    | .755        |
|        | 14       | .726 | .024       | .678                    | .774        |
| ADHD   | 1        | .780 | .021       | .738                    | .822        |
|        | 2        | .760 | .021       | .718                    | .801        |
|        | 3        | .807 | .023       | .762                    | .852        |
|        | 4        | .742 | .027       | .688                    | .796        |
|        | 5        | .765 | .022       | .722                    | .809        |
|        | 6        | .762 | .023       | .716                    | .809        |
|        | 7        | .790 | .019       | .751                    | .829        |
|        | 8        | .778 | .030       | .718                    | .839        |
|        | 9        | .773 | .026       | .722                    | .825        |
|        | 10       | .725 | .024       | .676                    | .774        |
|        | 11       | .771 | .019       | .732                    | .810        |
|        | 12       | .794 | .029       | .735                    | .853        |
|        | 13       | .764 | .024       | .717                    | .811        |
|        | 14       | .776 | .024       | .728                    | .823        |
| normal | 1        | .742 | .021       | .700                    | .784        |
|        | 2        | .734 | .021       | .692                    | .775        |
|        | 3        | .775 | .023       | .730                    | .821        |
|        | 4        | .713 | .027       | .659                    | .767        |
|        | 5        | .701 | .022       | .658                    | .745        |
|        | 6        | .708 | .023       | .662                    | .754        |
|        | 7        | .753 | .019       | .714                    | .792        |
|        | 8        | .642 | .030       | .582                    | .703        |
|        | 9        | .718 | .026       | .667                    | .770        |
|        | 10       | .710 | .024       | .661                    | .759        |
|        | 11       | .722 | .019       | .683                    | .761        |
|        | 12       | .729 | .029       | .670                    | .787        |
|        | 13       | .724 | .024       | .677                    | .771        |
|        | 14       | .737 | .024       | .690                    | .785        |

**Table S11.** Mixed ANOVA interactions effects groups\*syllogism

**5. group \* Syllogism**

Measure: MEASURE\_1

| group  | Syllogism | Mean | Std. Error | 95% Confidence Interval |             |
|--------|-----------|------|------------|-------------------------|-------------|
|        |           |      |            | Lower Bound             | Upper Bound |
| ASD    | 1         | .678 | .025       | .629                    | .728        |
|        | 2         | .712 | .019       | .674                    | .749        |
| ADHD   | 1         | .768 | .025       | .719                    | .818        |
|        | 2         | .772 | .019       | .735                    | .810        |
| normal | 1         | .719 | .025       | .670                    | .769        |
|        | 2         | .725 | .019       | .688                    | .762        |

**Table S12.** Mixed ANOVA interactions effects channels\*syllogism

**6. Channels \* Syllogism**

Measure: MEASURE\_1

| Channels | Syllogism | Mean | Std. Error | 95% Confidence Interval |             |
|----------|-----------|------|------------|-------------------------|-------------|
|          |           |      |            | Lower Bound             | Upper Bound |
| 1        | 1         | .746 | .015       | .716                    | .776        |
|          | 2         | .763 | .012       | .739                    | .786        |
| 2        | 1         | .714 | .015       | .684                    | .744        |
|          | 2         | .739 | .010       | .718                    | .760        |
| 3        | 1         | .772 | .016       | .740                    | .804        |
|          | 2         | .786 | .013       | .761                    | .811        |
| 4        | 1         | .707 | .017       | .673                    | .740        |
|          | 2         | .711 | .016       | .679                    | .743        |
| 5        | 1         | .718 | .015       | .687                    | .748        |
|          | 2         | .726 | .012       | .702                    | .750        |
| 6        | 1         | .703 | .016       | .671                    | .735        |
|          | 2         | .719 | .013       | .693                    | .745        |
| 7        | 1         | .742 | .014       | .715                    | .770        |
|          | 2         | .757 | .012       | .732                    | .781        |
| 8        | 1         | .664 | .018       | .627                    | .701        |
|          | 2         | .669 | .019       | .631                    | .707        |
| 9        | 1         | .725 | .017       | .691                    | .758        |
|          | 2         | .733 | .015       | .702                    | .763        |
| 10       | 1         | .695 | .017       | .661                    | .728        |
|          | 2         | .707 | .014       | .679                    | .736        |
| 11       | 1         | .729 | .014       | .701                    | .758        |
|          | 2         | .749 | .011       | .728                    | .771        |
| 12       | 1         | .734 | .019       | .695                    | .772        |
|          | 2         | .753 | .016       | .721                    | .785        |
| 13       | 1         | .718 | .018       | .682                    | .753        |
|          | 2         | .746 | .012       | .723                    | .769        |
| 14       | 1         | .741 | .017       | .707                    | .774        |
|          | 2         | .752 | .013       | .727                    | .778        |

**Table S13.** Mixed ANOVA iterations effects groups\*channels\*syllogism.

| 7. group ^ Channels ^ Syllogism |          |           |      |            |                         |             |
|---------------------------------|----------|-----------|------|------------|-------------------------|-------------|
| Measure: MEASURE_1              |          |           |      |            |                         |             |
| group                           | Channels | Syllogism | Mean | Std. Error | 95% Confidence Interval |             |
|                                 |          |           |      |            | Lower Bound             | Upper Bound |
| ASD                             | 1        | 1         | .719 | .026       | .668                    | .771        |
|                                 |          | 2         | .762 | .021       | .721                    | .803        |
|                                 | 2        | 1         | .661 | .026       | .609                    | .713        |
|                                 |          | 2         | .712 | .018       | .676                    | .748        |
|                                 | 3        | 1         | .743 | .028       | .688                    | .799        |
|                                 |          | 2         | .765 | .022       | .722                    | .809        |
|                                 | 4        | 1         | .666 | .029       | .608                    | .724        |
|                                 |          | 2         | .679 | .028       | .624                    | .734        |
|                                 | 5        | 1         | .688 | .027       | .635                    | .741        |
|                                 |          | 2         | .709 | .021       | .667                    | .752        |
|                                 | 6        | 1         | .657 | .028       | .601                    | .712        |
|                                 |          | 2         | .669 | .022       | .624                    | .714        |
|                                 | 7        | 1         | .677 | .024       | .630                    | .725        |
|                                 |          | 2         | .735 | .021       | .692                    | .777        |
|                                 | 8        | 1         | .556 | .032       | .492                    | .620        |
|                                 |          | 2         | .604 | .033       | .538                    | .669        |
|                                 | 9        | 1         | .680 | .029       | .622                    | .738        |
|                                 |          | 2         | .709 | .027       | .656                    | .762        |
|                                 | 10       | 1         | .654 | .029       | .596                    | .712        |
|                                 |          | 2         | .682 | .025       | .633                    | .732        |
|                                 | 11       | 1         | .701 | .025       | .652                    | .750        |
|                                 |          | 2         | .748 | .019       | .711                    | .785        |
|                                 | 12       | 1         | .688 | .033       | .621                    | .754        |
|                                 |          | 2         | .726 | .028       | .671                    | .781        |
|                                 | 13       | 1         | .691 | .031       | .630                    | .753        |
|                                 |          | 2         | .723 | .020       | .683                    | .763        |
|                                 | 14       | 1         | .712 | .029       | .654                    | .770        |
|                                 |          | 2         | .740 | .022       | .696                    | .784        |
| ADHD                            | 1        | 1         | .779 | .026       | .728                    | .831        |
|                                 |          | 2         | .781 | .021       | .740                    | .822        |
|                                 | 2        | 1         | .752 | .026       | .700                    | .804        |
|                                 |          | 2         | .767 | .018       | .731                    | .803        |
|                                 | 3        | 1         | .802 | .028       | .746                    | .857        |
|                                 |          | 2         | .812 | .022       | .769                    | .856        |
|                                 | 4        | 1         | .739 | .029       | .681                    | .797        |
|                                 |          | 2         | .745 | .028       | .690                    | .800        |
|                                 | 5        | 1         | .763 | .027       | .710                    | .816        |
|                                 |          | 2         | .767 | .021       | .725                    | .810        |
|                                 | 6        | 1         | .754 | .028       | .698                    | .809        |
|                                 |          | 2         | .771 | .022       | .726                    | .816        |
|                                 | 7        | 1         | .798 | .024       | .750                    | .845        |
|                                 |          | 2         | .782 | .021       | .740                    | .825        |
|                                 | 8        | 1         | .783 | .032       | .719                    | .847        |
|                                 |          | 2         | .774 | .033       | .708                    | .839        |
|                                 | 9        | 1         | .779 | .029       | .720                    | .837        |
|                                 |          | 2         | .768 | .027       | .715                    | .821        |
|                                 | 10       | 1         | .728 | .029       | .670                    | .786        |
|                                 |          | 2         | .721 | .025       | .672                    | .771        |
|                                 | 11       | 1         | .767 | .025       | .718                    | .816        |
|                                 |          | 2         | .775 | .019       | .738                    | .812        |
|                                 | 12       | 1         | .792 | .033       | .726                    | .859        |
|                                 |          | 2         | .796 | .028       | .741                    | .851        |
|                                 | 13       | 1         | .751 | .031       | .690                    | .812        |
|                                 |          | 2         | .777 | .020       | .737                    | .817        |
|                                 | 14       | 1         | .773 | .029       | .715                    | .831        |
|                                 |          | 2         | .778 | .022       | .734                    | .822        |
| normal                          | 1        | 1         | .739 | .026       | .688                    | .790        |
|                                 |          | 2         | .745 | .021       | .704                    | .786        |
|                                 | 2        | 1         | .730 | .026       | .678                    | .782        |
|                                 |          | 2         | .737 | .018       | .701                    | .773        |
|                                 | 3        | 1         | .770 | .028       | .715                    | .826        |
|                                 |          | 2         | .780 | .022       | .737                    | .824        |
|                                 | 4        | 1         | .716 | .029       | .658                    | .774        |
|                                 |          | 2         | .709 | .028       | .654                    | .764        |
|                                 | 5        | 1         | .702 | .027       | .649                    | .755        |
|                                 |          | 2         | .701 | .021       | .659                    | .743        |
|                                 | 6        | 1         | .698 | .028       | .643                    | .754        |
|                                 |          | 2         | .718 | .022       | .673                    | .762        |
|                                 | 7        | 1         | .752 | .024       | .704                    | .799        |
|                                 |          | 2         | .754 | .021       | .712                    | .796        |
|                                 | 8        | 1         | .653 | .032       | .590                    | .717        |
|                                 |          | 2         | .631 | .033       | .565                    | .696        |
|                                 | 9        | 1         | .716 | .029       | .658                    | .774        |
|                                 |          | 2         | .721 | .027       | .668                    | .774        |
|                                 | 10       | 1         | .702 | .029       | .644                    | .760        |
|                                 |          | 2         | .718 | .025       | .669                    | .768        |
|                                 | 11       | 1         | .720 | .025       | .671                    | .769        |
|                                 |          | 2         | .724 | .019       | .687                    | .762        |
|                                 | 12       | 1         | .721 | .033       | .655                    | .788        |
|                                 |          | 2         | .736 | .028       | .681                    | .791        |
|                                 | 13       | 1         | .711 | .031       | .650                    | .772        |
|                                 |          | 2         | .737 | .020       | .697                    | .777        |
|                                 | 14       | 1         | .736 | .029       | .678                    | .795        |
|                                 |          | 2         | .738 | .022       | .694                    | .782        |

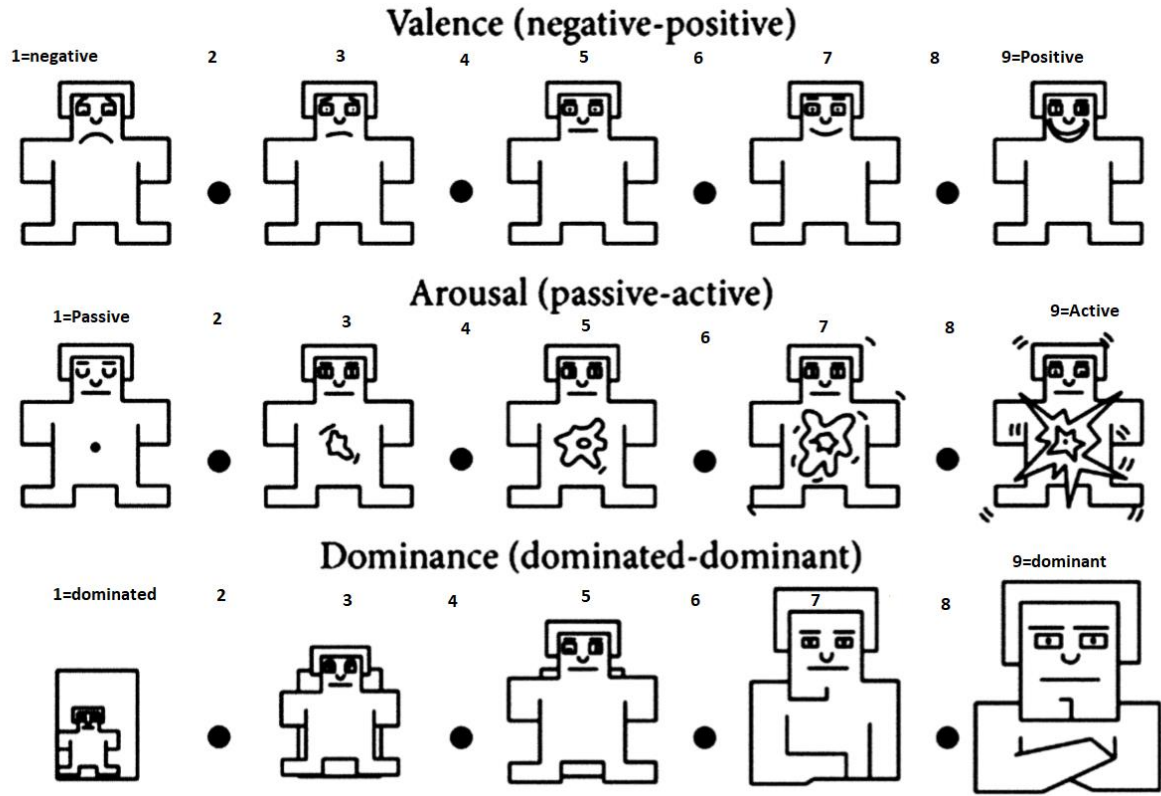

**Figure S1.** The Self-assessment Manikin (SAM) instrument for assessing the dimensions of emotion state: Valence, Arousal, and Dominance or Control. Numbers indicate the rate scale, with 2,4,6,8 the rates between two pictures, allowing a 9 point score rating of a participant state of emotion (*Taken from Bradley et al., 1994, with minor modifications of one of the authors (AP) of the present paper*).

### Results of the permutation tests

In this section we present the results of the permutation test, described in section 2.5.1. Figure S2,b below shows the distribution of  $I_{total\_perm}$  (10000 permutations), for the case of EEG, valid type of syllogism. The histogram has been normalized probability-wised so with this normalization, the height of each bar is equal to the probability of selecting an observation within that bin interval, and the height of all of the bars sums to 1. The value of deterministic  $I_{total}=1.5644$  occurs with probability  $p=0.0326 < 0.05$ , so the extracted common information from the two Brain activity and behavioral tables is statistically significant. Figure S2,a shows the distribution of  $I_{total\_perm}$  (10000 permutations), for the case of MSE feature, valid of syllogism (similar results are for the invalid type). The histogram has been normalized probability-wised so with this normalization, the height of each bar is equal to the probability of selecting an observation within that bin interval, and the height of all of the bars sums to 1. The value of deterministic  $I_{total}=6.4841$  occurs with probability  $p=0.046 < 0.05$ , so the extracted common information from the two Brain activity and behavioral tables is statistically significant. However, *this p value is closer to 5% than the one value found in the case of using the MSE feature, an indication that MSE extracts important and mainly nonlinear information from EEGs, allowing greater amount of common information to be extracted via PLSC, enhancing further the efficiency of this method.*

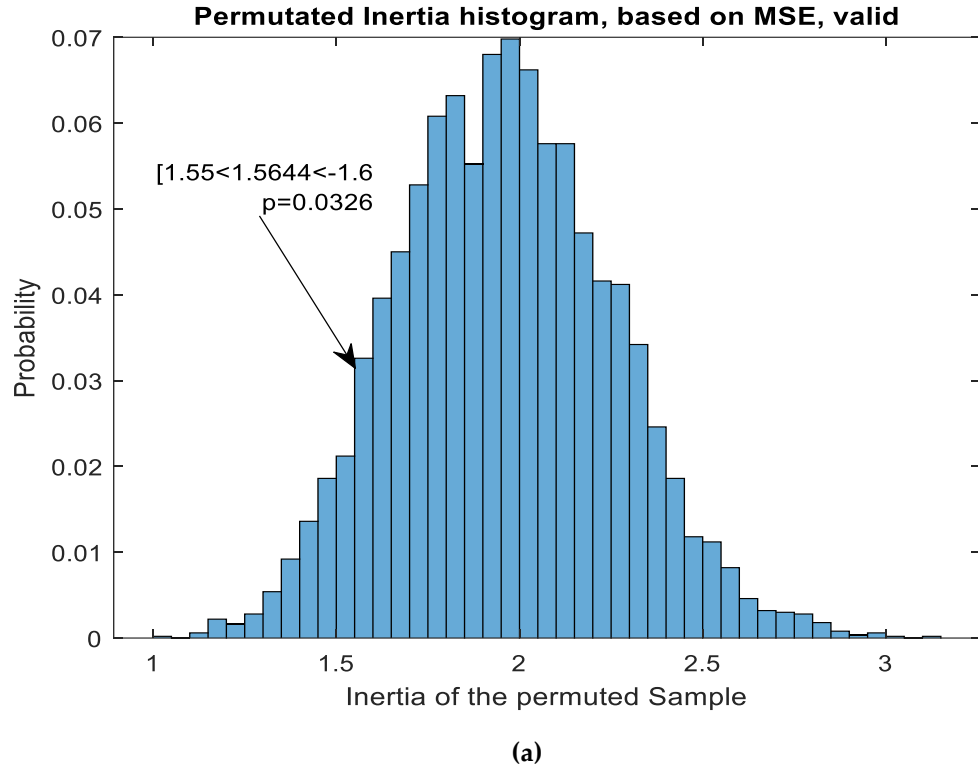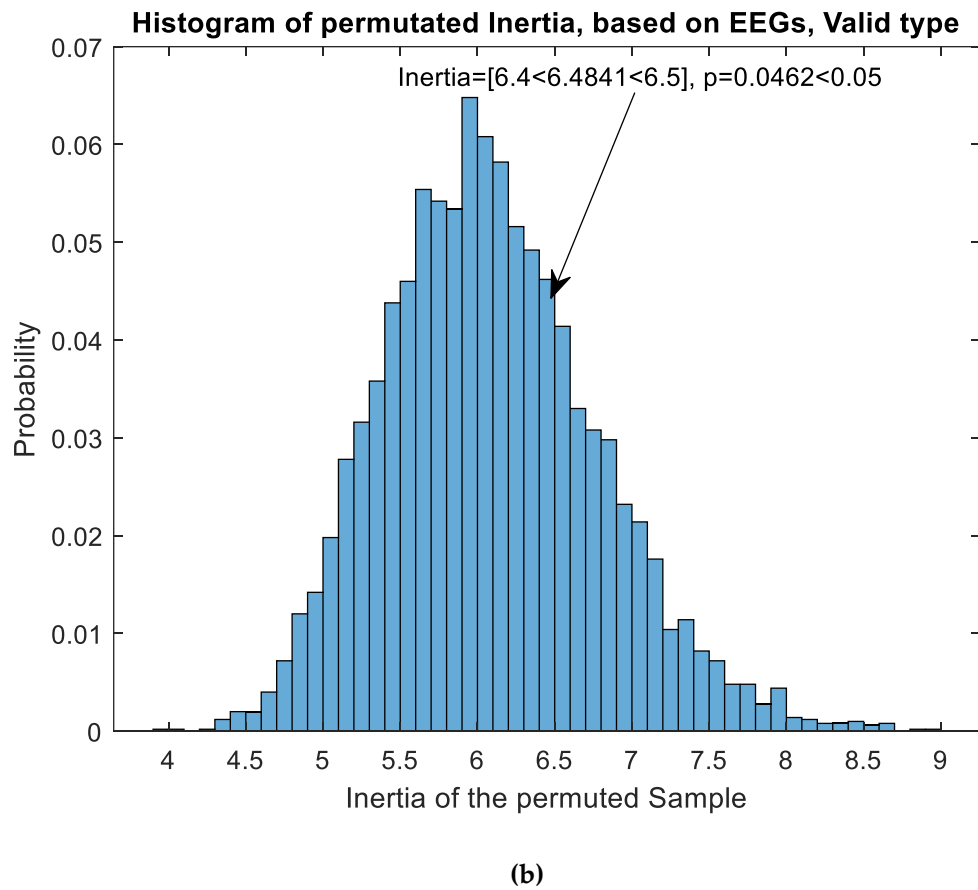

**Figure S2.** Distribution of  $I_{\text{(total\_perm)}}$  (10000 permutations), for the case of EEG, valid type of syllogism **(a)**, Distribution of  $I_{\text{(total\_perm)}}$  (10000 permutations), for the case of MSE feature, valid type of syllogism **(b)**.
